# Supplementary material for: Palladium Phthalocyanine Nanowire-Based Highly Sensitive Sensors for NO2(g) Detection
Source: MDPI journal article supplement (doi:10.3390/s24061819), 2024-03-12
Supplement: s1 [file s1]

# Palladium Phthalocyanine Nanowire-Based Highly Sensitive Sensors for NO<sub>2(g)</sub> Detection

Crystal Otero Vélez <sup>1,2</sup>, Soraya Y. Flores <sup>1</sup>, Luis F. Fonseca <sup>1</sup> and Dalice M. Piñero Cruz <sup>1,2,\*</sup>

<sup>1</sup> Faculty of Natural Sciences, University of Puerto Rico, Río Piedras Campus, San Juan 00931, Puerto Rico

<sup>2</sup> Molecular Science Research Center, San Juan 00926-2614, Puerto Rico

\* Correspondence: dalice.pinero@upr.edu

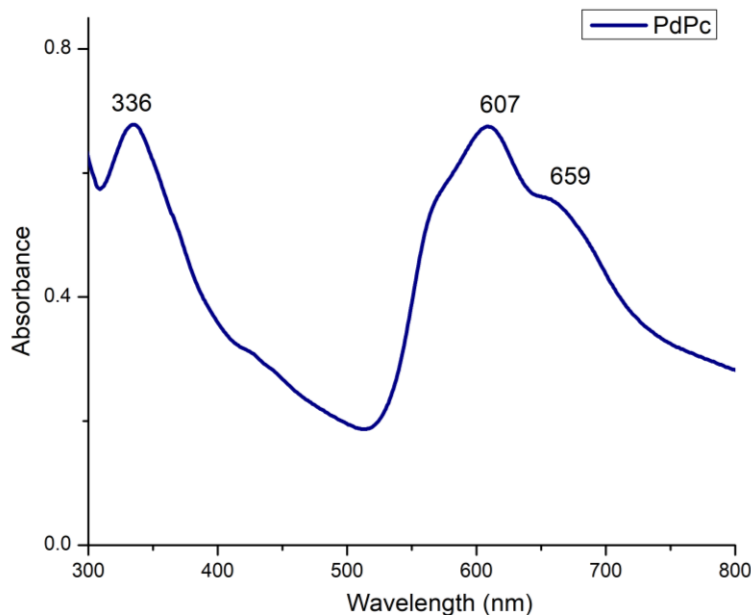

**Figure S1** *Uv-vis spectroscopy of palladium phthalocyanine powder in dimethylformamide (DMF)*

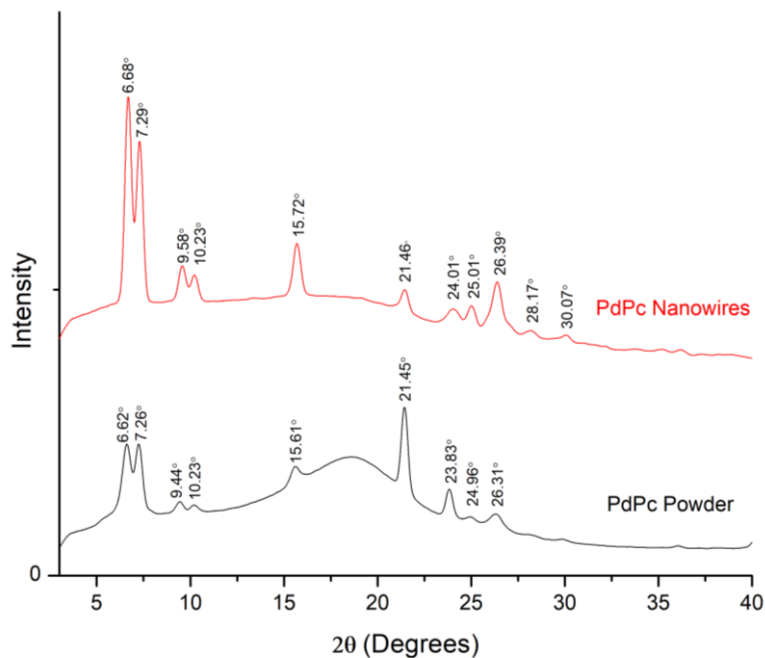

**Figure S2** X-Ray Diffraction (XRD) patterns of palladium phthalocyanine nanowires (top) and powder (bottom)

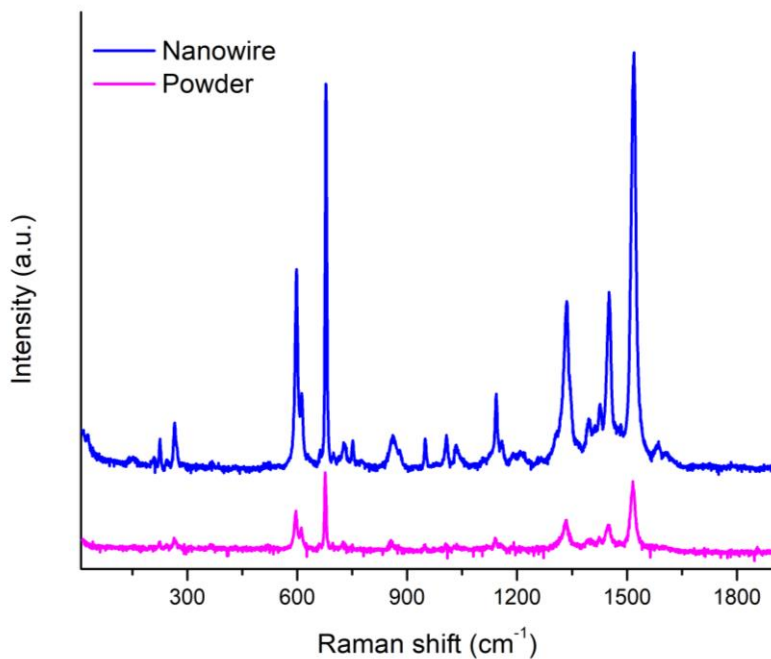

**Figure S3** Raman Shifts ( $\text{cm}^{-1}$ ) of PdPc Nanowires (blue), powder (pink)

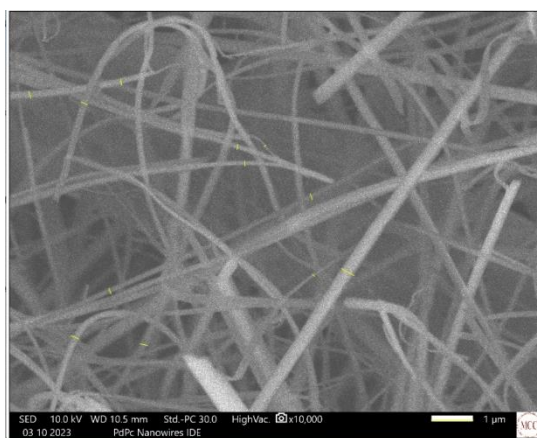

|    | Length (μm) |
|----|-------------|
| 1  | 0.15        |
| 2  | 0.17        |
| 3  | 0.18        |
| 4  | 0.36        |
| 5  | 0.07        |
| 6  | 0.14        |
| 7  | 0.12        |
| 8  | 0.11        |
| 9  | 0.04        |
| 10 | 0.13        |
| 11 | 0.19        |
| 12 | 0.18        |
| 13 | 1           |

Scale Measurement

**Figure S4** Thickness measurements of PdPc NWs.

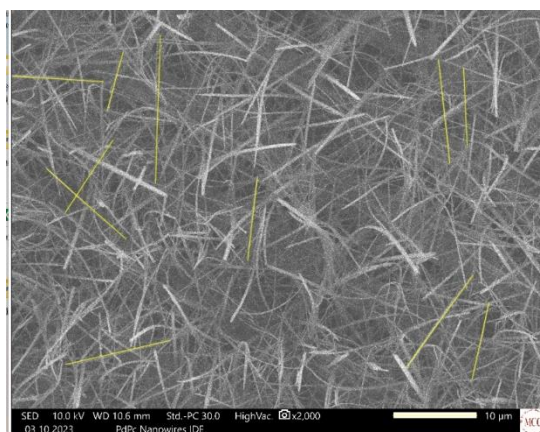

|    | Length (μm) |
|----|-------------|
| 1  | 9.1         |
| 2  | 12.3        |
| 3  | 10.1        |
| 4  | 7.3         |
| 5  | 10.8        |
| 6  | 17.7        |
| 7  | 10.3        |
| 8  | 12.8        |
| 9  | 12.7        |
| 10 | 13.6        |
| 11 | 9.4         |
| 12 | 10          |

Scale Measurement

**Figure S5** Length measurements of PdPc NWs.

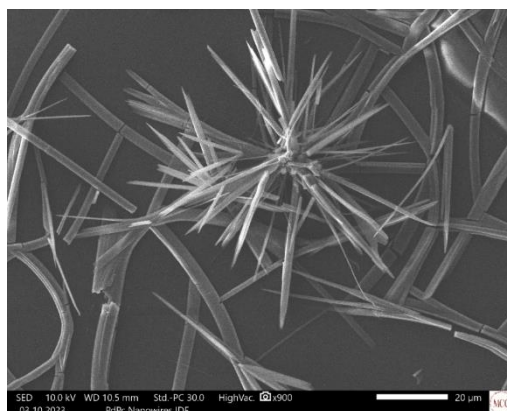

**Figure S6** Scanning electron microscopy (SEM) of palladium phthalocyanine nanoflower

PdPc Nanowires IDE

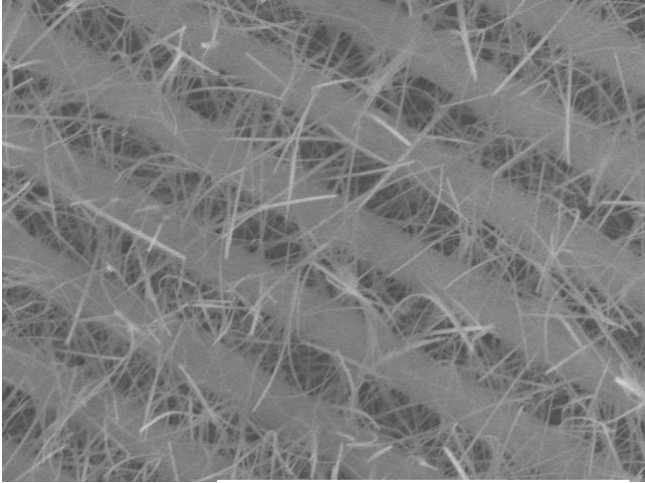

10  $\mu$ m

| Element            | Line | Mass%                | Atom%            |
|--------------------|------|----------------------|------------------|
| C                  | K    | 51.78 $\pm$ 0.05     | 70.00 $\pm$ 0.07 |
| N                  | K    | 14.64 $\pm$ 0.13     | 16.97 $\pm$ 0.15 |
| O                  | K    | 7.73 $\pm$ 0.06      | 7.84 $\pm$ 0.06  |
| Si                 | K    | 5.67 $\pm$ 0.02      | 3.28 $\pm$ 0.01  |
| Pd                 | L    | 3.54 $\pm$ 0.02      | 0.54 $\pm$ 0.00  |
| Au                 | M    | 16.64 $\pm$ 0.05     | 1.37 $\pm$ 0.00  |
| Total              |      | 100.00               | 100.00           |
| PdPc Nanowires IDE |      | Fitting ratio 0.0754 |                  |

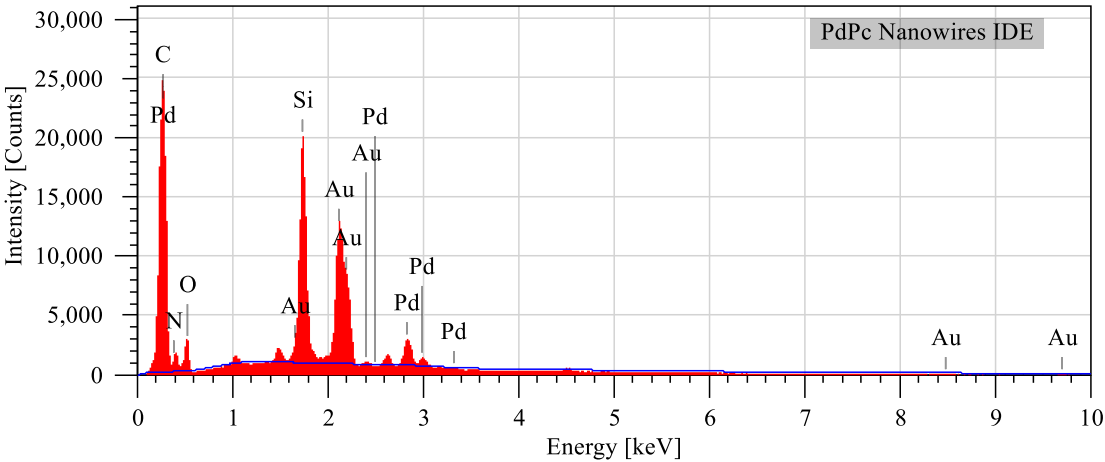

**Figure S7** Energy dispersive spectroscopy (EDS) analysis of PdPc nanowires on interdigitated gold electrode (IDE)

PdPc Nanowires

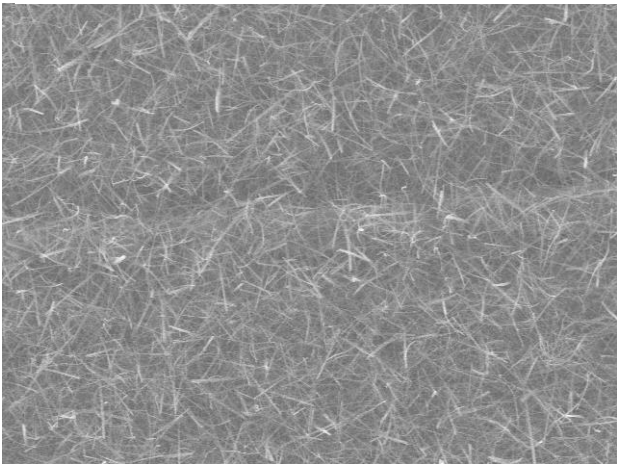

10 μm

| Element        | Line | Mass%                | Atom%      |
|----------------|------|----------------------|------------|
| C              | K    | 43.10±0.11           | 61.21±0.15 |
| N              | K    | 5.40±0.09            | 6.58±0.11  |
| O              | K    | 0.56±0.02            | 0.60±0.02  |
| Al             | K    | 49.67±0.06           | 31.41±0.04 |
| Pd             | L    | 1.27±0.02            | 0.20±0.00  |
| Total          |      | 100.00               | 100.00     |
| PdPc Nanowires |      | Fitting ratio 0.0063 |            |

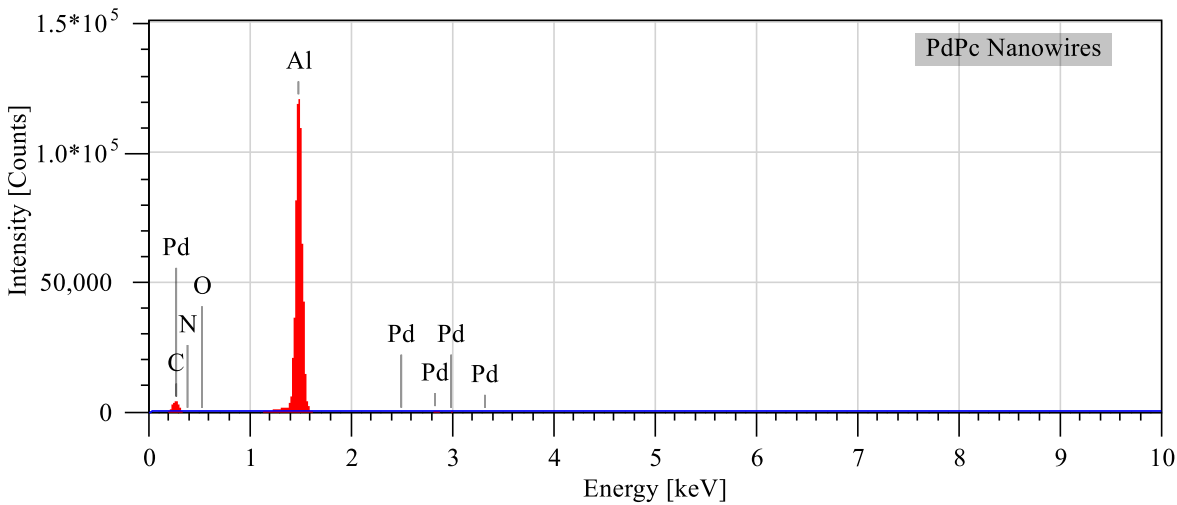

**Figure S8** Energy dispersive spectroscopy (EDS) analysis of PdPc nanowires on aluminum substrate.

## PdPc Powder

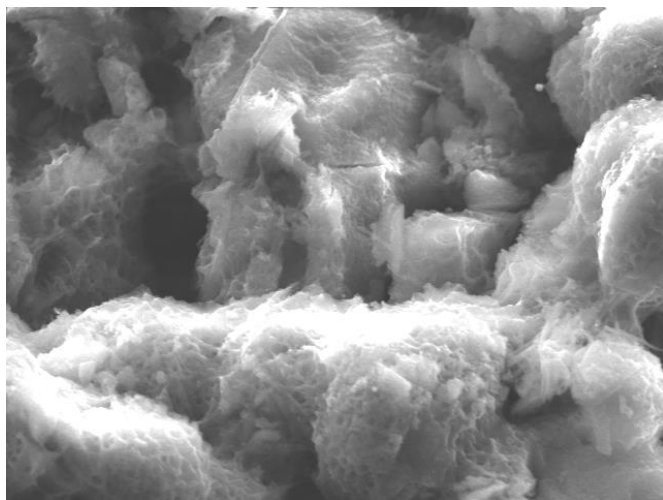

| Element     | Line | Mass%                | Atom%      |
|-------------|------|----------------------|------------|
| C           | K    | 51.08±0.04           | 63.39±0.05 |
| N           | K    | 32.20±0.18           | 34.27±0.19 |
| Pd          | L    | 16.72±0.05           | 2.34±0.01  |
| Total       |      | 100.00               | 100.00     |
| PdPc Powder |      | Fitting ratio 0.1914 |            |

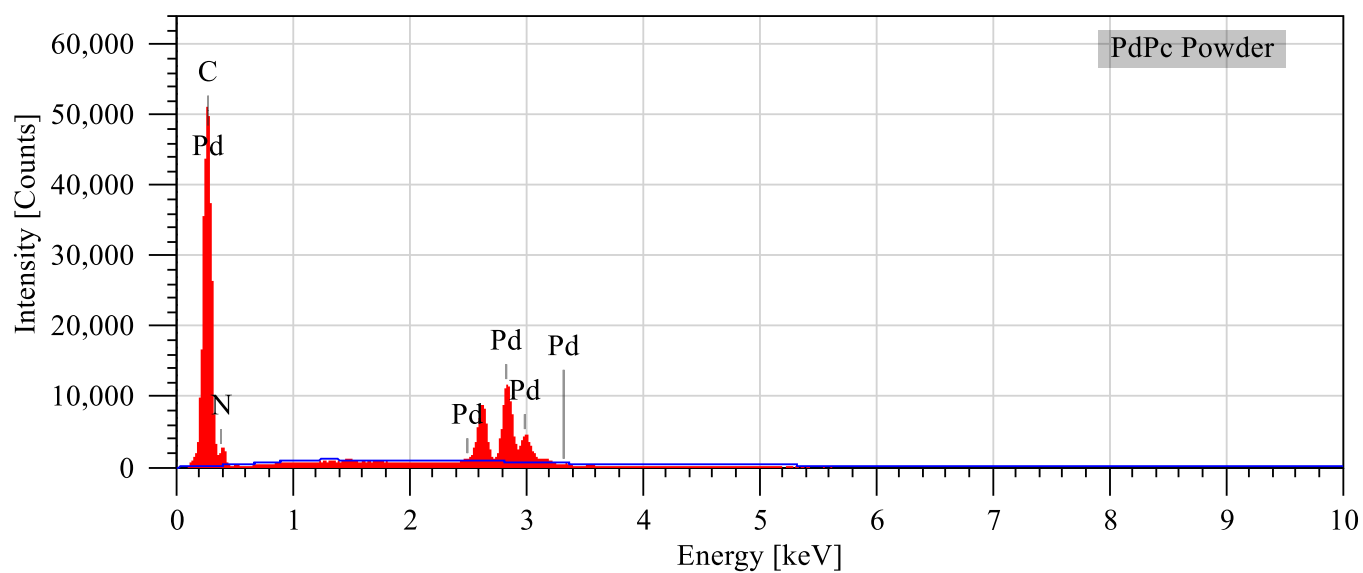

**Figure S9** Energy dispersive spectroscopy (EDS) analysis of PdPc powder.

**Table S1.** Gas Sensing Experiments

| <b>Material</b> | <b># of Repetitions</b> | <b>Tested Gas</b> | <b>Gas Concentration</b> |
|-----------------|-------------------------|-------------------|--------------------------|
| PdPc Nanowires  | 8                       | NO <sub>2</sub>   | 0.5 ppm                  |
| PdPc Nanowires  | 3                       | NO <sub>2</sub>   | 1 ppm                    |
| PdPc Nanowires  | 4                       | NO <sub>2</sub>   | 4 ppm                    |
| PdPc Nanowires  | 2                       | NO <sub>2</sub>   | 10 ppm                   |
